# Supplementary material for: Long-term passive acoustic recordings track the changing distribution of North Atlantic right whales (Eubalaena glacialis) from 2004 to 2014
Source: PubMed Central journal article supplement (PMC5647423; doi:10.1038/s41598-017-13359-3), 2017-10-18
Supplement: 41598_2017_13359_MOESM1_ESM.pdf [file 41598_2017_13359_MOESM1_ESM.pdf]

## Long-term passive acoustic recordings track the changing distribution of North Atlantic right whales (*Eubalaena glacialis*) from 2004 to 2014

Genevieve E. Davis<sup>1,2\*</sup>, Mark F. Baumgartner<sup>3</sup>, Julianne M. Bonnell<sup>1</sup>, Joel Bell<sup>4</sup>, Catherine Berchok<sup>5</sup>, Jaqueline Bort Thornton<sup>4</sup>, Solange Brault<sup>2</sup>, Gary Buchanan<sup>6</sup>, Russell A. Charif<sup>7</sup>, Danielle Cholewiak<sup>8</sup>, Christopher W. Clark<sup>7</sup>, Peter Corkeron<sup>8</sup>, Julien Delarue<sup>9</sup>, Kathleen Dudzinski<sup>10</sup>, Leila Hatch<sup>11</sup>, John Hildebrand<sup>12</sup>, Lynne Hodge<sup>13</sup>, Holger Klinck<sup>7,14</sup>, Scott Kraus<sup>15</sup>, Bruce Martin<sup>9</sup>, David K. Mellinger<sup>14</sup>, Hilary Moors-Murphy<sup>16</sup>, Sharon Nieukirk<sup>14</sup>, Doug Nowacek<sup>13</sup>, Susan Parks<sup>17</sup>, Andy Read<sup>13</sup>, Aaron N. Rice<sup>7</sup>, Denise Risch<sup>18</sup>, Ana Širović<sup>12</sup>, Melissa Soldevilla<sup>19</sup>, Kate Stafford<sup>20</sup>, Joy Stanistreet<sup>13</sup>, Erin Summers<sup>21</sup>, Sean Todd<sup>22</sup>, Ann Warde<sup>7</sup>, Sofie M. Van Parijs<sup>8</sup>

<sup>1</sup>Contracted under NOAA Northeast Fisheries Science Center, 166 Water Street, Woods Hole, MA 02543, USA

<sup>2</sup>University of Massachusetts Boston, 100 Morrissey Blvd, Boston, MA 02125, USA

<sup>3</sup>Woods Hole Oceanographic Institution, 266 Woods Hole Rd, Woods Hole, MA 02543, USA

<sup>4</sup>Naval Facilities Engineering Command Atlantic, Norfolk, VA 23508, USA

<sup>5</sup>NOAA Alaska Fisheries Science Center, 7600 Sand Point Way N.E., Seattle, WA 98115, USA

<sup>6</sup>New Jersey Department of Environmental Protection, Trenton, NJ 08625, USA

<sup>7</sup>Bioacoustics Research Program, Cornell Lab of Ornithology, Cornell University, 159 Sapsucker Woods Road, Ithaca, NY 14850, USA

<sup>8</sup>NOAA Northeast Fisheries Science Center, 166 Water Street, Woods Hole, MA 02543, USA

<sup>9</sup>JASCO Applied Sciences, 32 Troop Ave, Dartmouth, NS B3B 1Z1, Canada

<sup>10</sup>Dolphin Communication Project, Port St. Lucie, FL 34985, USA

<sup>11</sup>NOAA Stellwagen Bank National Marine Sanctuary, 175 Edward Foster Rd, Scituate, MA 02066, USA

<sup>12</sup>Scripps Institution of Oceanography, University of California San Diego, 9500 Gilman Dr MC 0205, La Jolla, CA 92037, USA

<sup>13</sup>Duke University Marine Laboratory, 135 Duke Marine Lab Rd, Beaufort, NC 28516, USA

<sup>14</sup>Oregon State University, 2030 SE Marine Science Drive, Newport, OR 97365, USA

<sup>15</sup>New England Aquarium, Central Wharf, Boston, MA 02110, USA

<sup>16</sup>Fisheries and Oceans Canada, Bedford Institute of Oceanography, 1 Challenger Drive, Dartmouth, NS B2Y 4A2, Canada

<sup>17</sup>Syracuse University, 107 College Place, Syracuse, NY 13244, USA

<sup>18</sup>The Scottish Association for Marine Science (SAMS), Oban, PA37 1QA, Scotland, UK

<sup>19</sup>NOAA Southeast Fisheries Science Center, 75 Virginia Beach Drive, Miami, FL 33149, USA

<sup>20</sup>University of Washington, Applied Physics Laboratory, 1013 NE 40th St, Seattle, WA 98105, USA

<sup>21</sup>Maine Department of Marine Resources, West Boothbay Harbor, ME 04575, USA

<sup>22</sup>Allied Whale, College of the Atlantic, 105 Eden St, Bar Harbor, ME 04609, USA

\*genevieve.davis@noaa.gov

Supplementary Table 1: Data Summary: Summary of recorder locations, types, and configurations for all analyzed data. Recorders are grouped by deployment location with data gaps indicating periods of time within the recording dates that no recorders were in the water in that area.

| Region  | Location                     | Unit Type | # Units | Configuration     | Recording Dates   | Central Latitude | Central Longitude | Recording Schedule   | Data Gaps                                                                                     |
|---------|------------------------------|-----------|---------|-------------------|-------------------|------------------|-------------------|----------------------|-----------------------------------------------------------------------------------------------|
| 1       | Davis Strait                 | HARU      | 3       | Line              | 10/2006 - 10/2007 | 67.10            | -57.72            | continuous           |                                                                                               |
| 2       | Iceland/Greenland            | HARU      | 5       | Array             | 05/2007 - 07/2008 | 60.90            | -29.30            | continuous           |                                                                                               |
| 3       | Emerald Bank, Scotian Shelf  | HARU      | 2       | Single            | 08/2005 - 06/2006 | 43.15            | -63.67            | continuous           |                                                                                               |
|         | Roseway Basin, Scotian Shelf | HARU      | 1       | Single            | 08/2005 - 06/2006 | 42.97            | -65.06            | continuous           |                                                                                               |
|         | Eastern Scotian Slope        | MARU      | 1-2     | Single            | 07/2006 - 01/2007 | 43.78            | -58.74            | 10/50 min on/off     | 09/2006 - 12/2006                                                                             |
|         | Eastern Scotian Slope        | MARU      | 2-5     | Single            | 08/2007 - 03/2009 | 43.99            | -58.40            | 7/53 min on/off      | 10/2007 - 12/2007, 03/2008 - 06/2008, 09/2008 - 12/2008                                       |
|         | Eastern Scotian Slope        | AMAR      | 1       | Single            | 03/2010           | 43.95            | -59.00            | continuous           |                                                                                               |
|         | Gulf of St. Lawrence         | MARU      | 2       | Single            | 06/2010 - 09/2010 | 50.07            | -63.92            | continuous           |                                                                                               |
|         | Eastern Scotian Slope        | AMAR      | 3       | Single            | 10/2012 - 09/2013 | 43.94            | -58.52            | 13/2 min on/off      | 04/2013                                                                                       |
|         | Emerald Basin, Scotian Shelf | Guardbuoy | 1       | Single            | 08/2013           | 43.37            | -63.22            | 4.75/0.25 min on/off |                                                                                               |
|         | Roseway Basin, Scotian Shelf | Guardbuoy | 1-2     | Single            | 08/2013 - 09/2013 | 42.90            | -65.22            | 4.75/0.25 min on/off |                                                                                               |
|         | Eastern Scotian Slope        | AMAR      | 3       | Single            | 11/2013 - 10/2014 | 43.95            | -58.54            | 17/3 min on/off      | 04/2014                                                                                       |
| 4       | Bay of Fundy                 | MARU      | 5       | Array             | 08/2004, 08/2005  | 44.63            | -66.45            | continuous           |                                                                                               |
|         | Gulf of Maine                | MARU      | 7       | Single            | 07/2008 - 10/2008 | 44.02            | -68.03            | continuous           |                                                                                               |
|         | Gulf of Maine                | MARU      | 1       | Single            | 07/2009 - 10/2009 | 44.04            | -68.07            | continuous           |                                                                                               |
|         | Gulf of Maine                | MARU      | 1       | Single            | 10/2009 - 10/2010 | 43.30            | -68.62            | continuous           | 06/2010                                                                                       |
|         | Gulf of Maine                | MARU      | 2       | Single            | 07/2010 - 01/2011 | 43.08            | -70.46            | continuous           |                                                                                               |
|         | Gulf of Maine                | MARU      | 9       | Single            | 09/2010 - 12/2010 | 44.04            | -68.57            | continuous           |                                                                                               |
|         | Gulf of Maine                | MARU      | 2       | Single            | 10/2010 - 05/2011 | 43.37            | -68.51            | continuous           |                                                                                               |
|         | Gulf of Maine                | MARU      | 1       | Single            | 07/2011 - 09/2011 | 44.01            | -68.07            | continuous           |                                                                                               |
|         | Massachusetts Bay            | MARU      | 1       | Single            | 01/2006 - 05/2010 | 42.42            | -70.28            | continuous           | 06/2006, 06/2008                                                                              |
|         | Massachusetts Bay            | MARU      | 3       | Single            | 04/2011 - 05/2011 | 42.21            | -70.17            | continuous           |                                                                                               |
| 5       | Massachusetts Bay            | MARU      | 2       | Single            | 08/2011 - 10/2011 | 42.20            | -70.15            | continuous           |                                                                                               |
|         | Massachusetts Bay            | MARU      | 1       | Single            | 06/2013 - 11/2013 | 42.30            | -70.13            | continuous           |                                                                                               |
|         | Massachusetts Bay            | MARU      | 2       | Single            | 11/2013 - 04/2014 | 42.25            | -70.42            | continuous           |                                                                                               |
|         | Massachusetts Bay            | MARU      | 1       | Single            | 10/2014 - 01/2015 | 42.40            | -70.13            | continuous           |                                                                                               |
|         | Nantucket Sound              | AMAR      | 1       | Single            | 10/2010 - 07/2011 | 41.50            | -70.30            | continuous           |                                                                                               |
|         | Georges Bank                 | MARU      | 3       | Single            | 03/2012 - 06/2012 | 41.52            | -68.87            | continuous           |                                                                                               |
| 6       | Georges Bank                 | MARU      | 1       | Single            | 03/2012 - 04/2012 | 42.09            | -67.40            | continuous           |                                                                                               |
|         | Georges Bank                 | MARU      | 1       | Single            | 03/2012 - 09/2014 | 40.92            | -66.520           | continuous           | 07/2012 - 04/2014                                                                             |
|         | Georges Bank                 | MARU      | 1       | Single            | 03/2012 - 09/2014 | 41.36            | -66.160           | continuous           | 05/2012 - 04/2014                                                                             |
|         | Georges Bank                 | MARU      | 1       | Single            | 05/2013 - 09/2014 | 40.23            | -68.220           | continuous           | 08/2013 - 04/2014                                                                             |
|         | Georges Bank                 | MARU      | 1       | Single            | 04/2014 - 09/2014 | 40.58            | -67.04            | continuous           |                                                                                               |
|         | Georges Bank                 | HARU      | 1       | Single            | 06/2014 - 01/2015 | 40.13            | -66.25            | continuous           |                                                                                               |
|         | Bear Seamount                | AMAR      | 1       | Single            | 07/2014 - 01/2015 | 40.29            | -67.72            | 5.6/24.3 min on/off  |                                                                                               |
| 7       | New York                     | MARU      | 6-7     | Line              | 02/2008 - 03/2009 | 40.32            | -72.22            | continuous           | 05/2008 - 8/2008                                                                              |
|         | Nantucket                    | MARU      | 5-8     | Line              | 11/2011 - 02/2014 | 40.81            | -70.52            | continuous           | 10/2004 - 02/2013                                                                             |
|         | Georges Bank                 | MARU      | 1       | Single            | 05/2013 - 04/2017 | 40.65            | -69.58            | continuous           | 08/2013 - 04/2014                                                                             |
|         | Georges Bank                 | MARU      | 1-3     | Single            | 05/2013 - 09/2014 | 39.93            | -70.16            | continuous           | 07/2013 - 04/2014                                                                             |
|         | Georges Bank                 | MARU      | 1       | Single            | 04/2014 - 09/2014 | 39.49            | -72.13            | continuous           |                                                                                               |
|         | New York Harbor              | MARU      | 2-3     | Single            | 02/2008 - 03/2009 | 40.39            | -73.67            | continuous           | 05/2008 - 8/2008                                                                              |
| 8       | New Jersey                   | MARU      | 1-4     | Single            | 03/2008 - 11/2009 | 39.44            | -74.08            | continuous           | 06/2009 - 08/2009                                                                             |
|         | New Jersey                   | MARU      | 1-2     | Single            | 06/2008 - 10/2009 | 39.42            | -74.08            | 5/25 min on/off      | 06/2009 - 08/2009                                                                             |
|         | Delaware                     | AMAR      | 1       | Single            | 06/2010 - 08/2011 | 38.70            | -74.70            | continuous           |                                                                                               |
|         | Virginia                     | MARU      | 4-5     | Single            | 06/2012 - 07/2014 | 36.90            | -75.26            | continuous           |                                                                                               |
|         | Virginia                     | HARP      | 1       | Single            | 06/2014 - 01/2015 | 37.17            | -74.47            | continuous           |                                                                                               |
| 9       | Cape Hatteras                | HARP      | 1       | Single            | 03/2012 - 11/2014 | 35.34            | -74.86            | continuous           | 04/2012 - 10/2012, 03/2013 - 05/2014                                                          |
|         | Cape Hatteras                | MARU      | 4-5     | Line              | 10/2013 - 01/2015 | 35.37            | -75.16            | continuous           | 06/2014 - 10/2014                                                                             |
| 10      | North Carolina               | MARU      | 3       | Line              | 01/2006 - 04/2006 | 33.61            | -78.15            | continuous           |                                                                                               |
|         | South Carolina               | MARU      | 3       | Line              | 01/2006 - 04/2006 | 32.66            | -79.40            | continuous           |                                                                                               |
|         | Georgia                      | MARU      | 3       | Line              | 01/2006 - 04/2006 | 31.78            | -80.84            | continuous           |                                                                                               |
|         | North Carolina               | HARP      | 1-2     | Single            | 10/2007 - 06/2013 | 33.77            | -76.29            | 5/5 min on/off       | 01/2008 - 05/2008, 09/2008 - 04/2009, 08/2009 - 07/2010, 03/2011 - 08/2011, 12/2011 - 07/2012 |
|         | North Carolina               | HARP      | 1-2     | Single            | 11/2009 - 04/2010 | 33.74            | -76.50            | 5/10 min on/off      |                                                                                               |
|         | North Carolina               | MARU      | 5       | Array             | 07/2008           | 33.72            | -76.53            | continuous           |                                                                                               |
|         | Florida                      | HARP      | 1-2     | Single            | 04/2009 - 07/2011 | 30.27            | -80.32            | 5/10 min on/off      | 12/1009 - 02/2010                                                                             |
|         | Florida                      | MARU      | 9       | Array             | 09/2009 - 01/2010 | 30.20            | -80.19            | continuous           | 10/2009 - 12/2009                                                                             |
|         | Georgia                      | MARU      | 1       | Single            | 11/2009 - 06/2011 | 31.83            | -80.70            | continuous           | 05/2010 - 01/2011                                                                             |
|         | Florida                      | MARU      | 1       | Single            | 11/2009 - 05/2014 | 30.34            | -81.21            | continuous           | 05/2010 - 01/2011, 06/2011 - 12/2011, 05/2011 - 12/2012, 05/2013 - 11/2013                    |
|         | Georgia                      | MARU      | 1       | Single            | 06/2012 - 04/2013 | 31.86            | -80.72            | continuous           |                                                                                               |
|         | North Carolina               | MARU      | 1       | Single            | 06/2012 - 04/2013 | 34.17            | -76.51            | continuous           |                                                                                               |
|         | Georgia                      | MARU      | 1       | Single            | 11/2012 - 05/2014 | 30.57            | -81.23            | continuous           | 04/2013 - 11/2013                                                                             |
| Florida | HARP                         | 1         | Single  | 05/2013 - 01/2015 | 30.27             | -80.06           | continuous        | 06/2013 - 02/2014    |                                                                                               |
| 11      | Samana, Dominican Republic   | MARU      | 4       | Single            | 01/2009 - 03/2009 | 19.16            | -69.20            | continuous           |                                                                                               |
|         | Saba Bank, Caribbean         | MARU      | 1       | Single            | 10/2011 - 04/28   | 17.51            | -63.19            | 30/90 min on/off     |                                                                                               |
|         | Bermuda                      | HARP      | 1       | Single            | 06/2013 - 03/2014 | 31.93            | -65.15            | continuous           |                                                                                               |
